# Supplementary material
Source: PubMed Central journal article supplement (PMC3601918)
Supplement: NIHMS445638-supplement-supplement_1.pdf [file NIHMS445638-supplement-supplement_1.pdf]

|                     | anti-Dsg3<br>IgG1<br>(mg/dL) | anti-Dsg3<br>IgG4<br>(mg/dL) | anti-Dsg3<br>IgG4:IgG1<br>ratio | Total<br>IgG1<br>(mg/dL) | Total<br>IgG4<br>(mg/dL) | Total<br>IgG4:IgG1<br>ratio | % IgG1<br>Dsg3-<br>specific | % IgG4<br>Dsg3-<br>specific |
|---------------------|------------------------------|------------------------------|---------------------------------|--------------------------|--------------------------|-----------------------------|-----------------------------|-----------------------------|
| PV1                 | 18.3                         | 19.7                         | 1.08                            | 1878.5                   | 29.4                     | 0.02                        | 1.0                         | 67.0                        |
| PV2                 | 2.0                          | 0.9                          | 0.43                            | 675.7                    | 19.4                     | 0.03                        | 0.3                         | 4.5                         |
| PV3                 | 2.9                          | 1.2                          | 0.42                            | 329.4                    | 11.3                     | 0.03                        | 0.9                         | 10.8                        |
| PV4                 | 1.5                          | 1.6                          | 1.01                            | 686.6                    | 6.5                      | 0.01                        | 0.2                         | 24.0                        |
| PV5                 | 3.3                          | 0.8                          | 0.23                            | 407.1                    | 8.1                      | 0.02                        | 0.8                         | 9.5                         |
| PV6                 | 0.6                          | 5.7                          | 9.18                            | 469.6                    | 71.2                     | 0.15                        | 0.1                         | 8.0                         |
| PV7                 | 1.8                          | 2.1                          | 1.19                            | 365.8                    | 29.5                     | 0.08                        | 0.5                         | 7.1                         |
| PV8                 | 0.6                          | 1.7                          | 2.87                            | 505.2                    | 55.9                     | 0.11                        | 0.1                         | 3.1                         |
| PV9                 | 1.6                          | 0.9                          | 0.57                            | 335.7                    | 12.3                     | 0.04                        | 0.5                         | 7.5                         |
| PV10                | 0.2                          | 1.2                          | 5.08                            | 266.6                    | 75.9                     | 0.28                        | 0.1                         | 1.5                         |
| PV11                | 8.8                          | 23.9                         | 2.72                            | 771.0                    | 154.1                    | 0.20                        | 1.1                         | 15.5                        |
| PV12                | 0.0                          | 3.1                          | >100                            | 964.4                    | 57.3                     | 0.06                        | 0.0                         | 5.5                         |
| PV13                | 28.5                         | 5.8                          | 0.20                            | 620.4                    | 127.5                    | 0.21                        | 4.6                         | 4.6                         |
| PV14                | 2.1                          | 25.9                         | 12.32                           | 624.1                    | 67.6                     | 0.11                        | 0.3                         | 38.3                        |
| PV15                | 29.3                         | 3.1                          | 0.10                            | 611.0                    | 38.0                     | 0.06                        | 4.8                         | 8.0                         |
| PV16                | 29.3                         | 3.7                          | 0.13                            | 692.7                    | 48.6                     | 0.07                        | 4.2                         | 7.5                         |
| PV17                | 2.5                          | 2.4                          | 0.93                            | 474.4                    | 296.2                    | 0.62                        | 0.5                         | 0.8                         |
| PV18                | 0.1                          | 1.6                          | 15.20                           | 258.9                    | 6.2                      | 0.02                        | 0.0                         | 26.7                        |
| PV19                | 0.0                          | 1.3                          | >100                            | 475.0                    | 62.6                     | 0.13                        | 0.0                         | 2.0                         |
| PV20                | 37.4                         | 32.9                         | 0.88                            | 284.3                    | 53.8                     | 0.19                        | 13.2                        | 61.2                        |
| PV21                | 4.6                          | 12.0                         | 2.61                            | 408.3                    | 68.3                     | 0.17                        | 1.1                         | 17.5                        |
| PV22                | 6.8                          | 5.4                          | 0.78                            | 607.0                    | 97.4                     | 0.16                        | 1.1                         | 5.5                         |
| PV23                | 16.1                         | 0.1                          | 0.01                            | 331.6                    | 10.4                     | 0.03                        | 4.8                         | 1.1                         |
| PV24                | 5.5                          | 4.0                          | 0.74                            | 1061.2                   | 91.6                     | 0.09                        | 0.5                         | 4.4                         |
| PV25                | 2.0                          | 0.1                          | 0.07                            | 430.2                    | 48.5                     | 0.11                        | 0.5                         | 0.3                         |
| PV26                | 3.8                          | 0.2                          | 0.04                            | 593.4                    | 152.3                    | 0.26                        | 0.6                         | 0.1                         |
| PV27                | 1.5                          | 0.4                          | 0.29                            | 667.1                    | 98.8                     | 0.15                        | 0.2                         | 0.4                         |
| <b>Median</b>       | <b>2.5</b>                   | <b>2.1</b>                   | <b>0.88</b>                     | <b>505.2</b>             | <b>55.9</b>              | <b>0.11</b>                 | <b>0.5</b>                  | <b>7.1</b>                  |
| <b>IQ<br/>range</b> | <b>1.5 -<br/>7.8</b>         | <b>1.1 -<br/>5.6</b>         | <b>0.26 -<br/>2.8</b>           | <b>386.5 -<br/>671.4</b> | <b>24.2 -<br/>83.8</b>   | <b>0.04 -<br/>0.17</b>      | <b>0.2 -<br/>1.1</b>        | <b>2.6 -<br/>13.2</b>       |

**Supplemental Table 1. Quantitation of total and desmoglein 3-specific IgG1 and IgG4 in pemphigus vulgaris patients (n=27), including interquartile (IQ) ranges.**

|          | anti-Dsg1<br>IgG1<br>(mg/dL) | anti-Dsg1<br>IgG4<br>(mg/dL) | anti-Dsg1<br>IgG4:IgG1<br>ratio | Total<br>IgG1<br>(mg/dL) | Total<br>IgG4<br>(mg/dL) | Total<br>IgG4:IgG1<br>ratio | % IgG1<br>Dsg1-<br>specific | % IgG4<br>Dsg1-<br>specific |
|----------|------------------------------|------------------------------|---------------------------------|--------------------------|--------------------------|-----------------------------|-----------------------------|-----------------------------|
| PF1      | 45.8                         | 0.0                          | 0.00                            | 1063.3                   | 0.0                      | 0.00                        | 4.3                         | -                           |
| PF2      | 8.0                          | 17.0                         | 2.14                            | 783.7                    | 70.2                     | 0.09                        | 1.0                         | 24.3                        |
| PF3      | 118.8                        | 5.7                          | 0.05                            | 1116.6                   | 177.5                    | 0.16                        | 10.6                        | 3.2                         |
| PF4      | 14.9                         | 1.5                          | 0.10                            | 519.5                    | 77.7                     | 0.15                        | 2.9                         | 1.9                         |
| PF5      | 41.1                         | 0.9                          | 0.02                            | 799.5                    | 13.3                     | 0.02                        | 5.1                         | 6.9                         |
| PF6      | 13.0                         | 1.4                          | 0.11                            | 955.7                    | 62.6                     | 0.07                        | 1.4                         | 2.2                         |
| PF7      | 47.6                         | 14.9                         | 0.31                            | 511.8                    | 141.9                    | 0.28                        | 9.3                         | 10.5                        |
| PF8      | 11.8                         | 0.6                          | 0.05                            | 603.2                    | 17.9                     | 0.03                        | 2.0                         | 3.3                         |
| PF9      | 7.3                          | 5.6                          | 0.77                            | 581.1                    | 114.5                    | 0.20                        | 1.3                         | 4.9                         |
| PF10     | 1.0                          | 0.1                          | 0.13                            | 384.2                    | 35.4                     | 0.09                        | 0.3                         | 0.4                         |
| PF11     | 0.0                          | 2.2                          | >100                            | 738.6                    | 38.8                     | 0.05                        | 0.0                         | 5.6                         |
| PF12     | 0.0                          | 20.7                         | >100                            | 398.6                    | 83.4                     | 0.21                        | 0.0                         | 24.8                        |
| PF13     | 0.0                          | 3.8                          | >100                            | 663.8                    | 99.7                     | 0.15                        | 0.0                         | 3.8                         |
| PF14     | 0.0                          | 0.8                          | >100                            | 365.7                    | 62.6                     | 0.17                        | 0.0                         | 1.3                         |
| PF15     | 1.6                          | 7.9                          | 4.85                            | 585.0                    | 122.2                    | 0.21                        | 0.3                         | 6.5                         |
| PF16     | 0.0                          | 6.1                          | >100                            | 156.9                    | 144.1                    | 0.92                        | 0.0                         | 4.2                         |
| Median   | <b>7.7</b>                   | <b>3.0</b>                   | <b>0.54</b>                     | <b>594.1</b>             | <b>74.0</b>              | <b>0.15</b>                 | <b>1.0*</b>                 | <b>4.2*</b>                 |
| IQ range | <b>0 -<br/>21.5</b>          | <b>0.9 -<br/>6.6</b>         | <b>0.09 -<br/>&gt;100</b>       | <b>483.5 -<br/>787.7</b> | <b>38.0 -<br/>116.4</b>  | <b>0.07 -<br/>0.20</b>      | <b>0.0 -<br/>2.5*</b>       | <b>2.7 -<br/>6.7*</b>       |

**Supplemental Table 2. Quantitation of total and desmoglein 1-specific IgG1 and IgG4 in pemphigus foliaceus patients (n=16), including interquartile (IQ) ranges. \*For PF1, the percent IgG4 Dsg1-specific could not be calculated since total IgG4 was undetectable; therefore 15 samples contributed to the median analyses for the last two columns.**
